# Supplementary material
Source: publisher figshare collection journal article supplement (https://plos.figshare.com/articles/dataset/_/1150750)
Supplement: Supplementary file 1 [file 1]

Archive with 3 entries (3 files):
- Table_S1.pdf
- Table_S2.pdf
- Note_S1.pdf
