# Supplementary material
Source: publisher figshare collection journal article supplement (https://plos.figshare.com/articles/dataset/_/1150750)
Supplement: Supplementary file 1 [file 1 › Note_S1.pdf]

## Note S1. Technical Appendix of the Poisson age-period-cohort model

Sex-specific Poisson regression was used to estimate the relative risks (with 95% confidence intervals) of alcohol-related mortality by age, calendar period, and birth cohort. I assumed that the number of observed mortality cases,  $c_{ij}$ , out of a population size of  $n_{ij}$  women in age group  $i$  in time period  $j$ , followed a Poisson distribution with mean  $\mu_{ij}$ . Under the full age-period-cohort model, the mean is specified as:

$$\log(\mu_{ij}) = \alpha_{age_i} + \beta_{period_j} + \gamma_{cohort_k} + \log(n_{ij}),$$

where  $\alpha_{age_i}$  ( $i = 1, \dots, I$ ) is the age effect,  $\beta_{period_j}$  is the period effect ( $j = 1, \dots, J$ ),  $\gamma_{cohort_k}$  is the cohort effect ( $k = 1, \dots, K$ ,  $k = I + j - i$ ), and  $\log(n_{ij})$  is the offset term.
