# Supplementary material
Source: publisher figshare collection journal article supplement (https://plos.figshare.com/articles/dataset/_/1150750)
Supplement: Supplementary file 1 [file 1 › Table_S1.pdf]

**Table S1. Chronic alcohol-related causes by AAF and their corresponding ICD-9 and ICD-10 codes.**

| <b>Cause</b>                                                                                                          | <b>ICD-9</b>    | <b>ICD-10</b>             |
|-----------------------------------------------------------------------------------------------------------------------|-----------------|---------------------------|
| <b><i>100% Attributable</i></b>                                                                                       |                 |                           |
| Alcoholic psychosis                                                                                                   | 291             | F10.3-F10.9               |
| Alcohol abuse                                                                                                         | 305.0, 303.0    | F10.0, F10.1              |
| Alcohol dependence syndrome                                                                                           | 303.9           | F10.2                     |
| Alcohol polyneuropathy                                                                                                | 357.5           | G62.1                     |
| Degeneration of nervous system due to alcohol                                                                         | Nil             | G31.2                     |
| Alcoholic myopathy                                                                                                    | Nil             | G72.1                     |
| Alcohol cardiomyopathy                                                                                                | 425.5           | I42.6                     |
| Alcoholic gastritis                                                                                                   | 525.3           | K29.2                     |
| Alcoholic liver disease                                                                                               | 571.0-571.3     | K70-K70.4, K70.9          |
| Fetal alcohol syndrome                                                                                                | 655.4, 760.71   | Q86.0                     |
| Fetus and newborn affected by maternal use of alcohol                                                                 | Nil             | P04.3, O35.4              |
| Alcohol-induced chronic pancreatitis                                                                                  | Nil             | K86.0                     |
| <b><i>Direct Alcohol-Attributable Fractions Estimate</i></b>                                                          |                 |                           |
| Acute pancreatitis                                                                                                    | 577.0           | K85                       |
| Chronic pancreatitis                                                                                                  | 577.1           | K86.1                     |
| Epilepsy                                                                                                              | 345             | G40, G41                  |
| Esophageal varices                                                                                                    | 456.0-456.2     | I85, I98.20, I98.21       |
| Gastroesophageal hemorrhage                                                                                           | 530.7           | K22.6                     |
| Liver cirrhosis, unspecified                                                                                          | 571.5-571.9     | K74.3-K74.6, K76.0, K76.9 |
| Portal hypertension                                                                                                   | 572.3           | K76.6                     |
| Spontaneous abortion                                                                                                  | 634             | O03                       |
| <b><i>Indirect Alcohol-Attributable Fractions Estimates (English et al. and Ridolfo and Stevenson cut points)</i></b> |                 |                           |
| Breast cancer, females                                                                                                | 174             | C50                       |
| Cholelithiasis                                                                                                        | 574             | K80                       |
| Chronic hepatitis                                                                                                     | 571.4           | K73                       |
| Esophageal cancer                                                                                                     | 150             | C15                       |
| Hypertension                                                                                                          | 401-405         | I10-I15                   |
| Ischemic heart disease                                                                                                | 410-414         | I20-I25                   |
| Laryngeal cancer                                                                                                      | 161             | C32                       |
| Liver cancer                                                                                                          | 155             | C22                       |
| Low birth weight, prematurity, intrauterine                                                                           | 656.5, 764, 765 | O36.5, O36.4, P05, P07    |

growth retardation or death

|                                         |                        |                              |
|-----------------------------------------|------------------------|------------------------------|
| Oropharyngeal cancer                    | 141, 143-146, 148, 149 | C01-C06, C09-C10,<br>C12-C14 |
| Psoriasis                               | 696.1                  | L40.0-L40.4, L40.8, L40.9    |
| Supraventricular cardiac<br>dysrhythmia | 427.0, 427.2, 427.3    | I47.1, I47.9, I48            |

---

***Indirect Alcohol-Attributable Fractions Estimates***

***(Corrao et al. and Bargnardi et al. cut points)***

---

|                     |                      |                          |
|---------------------|----------------------|--------------------------|
| Stroke, ischemic    | 433-435, 437, 362.34 | G45, I63, I65-I67, I69.3 |
| Stroke, hemorrhagic | 430-432              | I60-I62, I69.0-I69.2     |
| Prostate cancer     | 185                  | C61                      |

---
