# Supplementary material
Source: publisher figshare collection journal article supplement (https://plos.figshare.com/articles/dataset/_/1150750)
Supplement: Supplementary file 1 [file 1 › Table_S2.pdf]

**Table S2. Acute alcohol-related causes by AAF and their corresponding ICD-9 and ICD-10 codes.**

| <b>Cause</b>                                                  | <b>ICD-9</b>                                 | <b>ICD-10</b>                                                                                                                                                                                                                                         |
|---------------------------------------------------------------|----------------------------------------------|-------------------------------------------------------------------------------------------------------------------------------------------------------------------------------------------------------------------------------------------------------|
| <b><i>100% Attributable</i></b>                               |                                              |                                                                                                                                                                                                                                                       |
| Alcohol poisoning                                             | 980.0, 980.1, E860.0, E860.1, E860.2, E860.9 | X45, Y15, T51.0, T51.1, T51.9                                                                                                                                                                                                                         |
| Suicide by and exposure to alcohol                            | Nil                                          | X65                                                                                                                                                                                                                                                   |
| Excessive blood level of alcohol                              | 790.3                                        | R78.0                                                                                                                                                                                                                                                 |
| <b><i>Direct Alcohol-Attributable Fractions Estimates</i></b> |                                              |                                                                                                                                                                                                                                                       |
| Air-space transport                                           | E840-E845                                    | V95-V97                                                                                                                                                                                                                                               |
| Aspiration                                                    | E911                                         | W78-W79                                                                                                                                                                                                                                               |
| Child maltreatment                                            | E960-E968                                    | X85-Y09, Y87.1                                                                                                                                                                                                                                        |
| Drowning injuries                                             | E910                                         | W65-W74                                                                                                                                                                                                                                               |
| Fall injuries                                                 | E880-E888, E848                              | W00-W19                                                                                                                                                                                                                                               |
| Fire injuries                                                 | E890-E899                                    | X00-X09                                                                                                                                                                                                                                               |
| Firearms                                                      | E922                                         | W32-W34                                                                                                                                                                                                                                               |
| Homicide                                                      | E960-E969                                    | X85-Y09, Y87.1                                                                                                                                                                                                                                        |
| Hypothermia                                                   | E901                                         | X31                                                                                                                                                                                                                                                   |
| Motor-vehicle nontraffic crashes                              | E820-E825                                    | V02.0, V03.0, V04.0, V09.0, V12-V14(.0-.2), V19.0-V19.3, V20-V28(.0-.2), V29.0-V29.3, V30-V39(.0-.3), V40-V49(.0-.3), V50-V59(.0-.3), V60-V69(.0-.3), V70-V79(.0-.3), V81.0, V82.0, V83-V86(.4-.9), V88.0-V88.8, V89.0                                |
| Motor-vehicle traffic crashes                                 | E810-E819                                    | V02(.1, .9), V03(.1, .9), V04(.1, .9), V09.2, V12-V14(.3-.9), V19.4-V19.6, V20-V28(.3-.9), V29.4-V29.9, V30-V39(.4-.9), V40-V49(.4-.9), V50-V59(.4-.9), V60-V69(.4-.9), V70-V79(.4-.9), V80.3-V80.5, V81.1, V82.1, V83-V86(.0-.3), V87.0-V87.8, V89.2 |
| Occupational and machine injuries                             | E917-E920                                    | W24-W31, W45                                                                                                                                                                                                                                          |
| Other road vehicle crashes                                    | E800-E807, E826-E829                         | V01, V05-V06, V09.1, V09.3, V09.9, V10-V11, V15-V18, V19.3, V19.8-V19.9, V80.0-V80.2, V80.6-V80.9, V81.2-V81.9, V82.2-V82.9, V87.9, V88.9, V89.1, V89.3, V89.9                                                                                        |
| Poisoning (not alcohol)                                       | E850-E869, E924.1                            | X40-X49 (except X45)                                                                                                                                                                                                                                  |
| Suicide                                                       | E950-E959                                    | X60-X84, (except X65) Y87.0                                                                                                                                                                                                                           |
| Water transport                                               | E830-E838                                    | V90-V94                                                                                                                                                                                                                                               |
